# Supplementary material for: Vapochromism of indolenine-based heptamethine cyanine dye adsorbed on silica gel
Source: Royal Society of Chemistry journal article supplement (doi:10.1039/d3nj00060e), 2023-01-01
Supplement: d3nj00060e1.pdf [file d3nj00060e1.pdf]

# Vapochromism of indolenine-based heptamethine cyanine dye adsorbed on silica gel

Mikiko Shibayama,<sup>†</sup> Yuki Uehashi,<sup>†</sup> Shouhei Ajioka,<sup>†</sup> Yasuhiro Kubota,<sup>†</sup> Toshiyasu Inuzuka,<sup>‡</sup> and Kazumasa Funabiki<sup>†\*</sup>

<sup>†</sup> Department of Chemistry and Biomolecular Science, Gifu University, 1-1, Yanagido, Gifu 501-1193, Japan.

<sup>‡</sup> Division of Instrumental Analysis, Life Science Research Center, Gifu University, 1-1 Yanagido, Gifu 501-1193, Japan

\*Corresponding Author. E-mail: [funabiki@gifu-u.ac.jp](mailto:funabiki@gifu-u.ac.jp)

## (Contents)

|                                                                     |       |
|---------------------------------------------------------------------|-------|
| <sup>1</sup> H, <sup>13</sup> C NMR, IR and HRMS for <b>3</b> ..... | S2-3  |
| Figures S1, S2, and S3 .....                                        | S4    |
| Computational calculation data .....                                | S5-S9 |
| Reference .....                                                     | S10   |

**2-((*E*)-2-((*E*)-2-chloro-3-(2-((*E*)-1,3,3-trimethylindolin-2-ylidene)ethylidene)cyclohex-1-en-1-yl)vinyl)-1,3,3-trimethyl-3*H*-indol-1-ium iodide  
(3)**

**<sup>1</sup>H NMR**

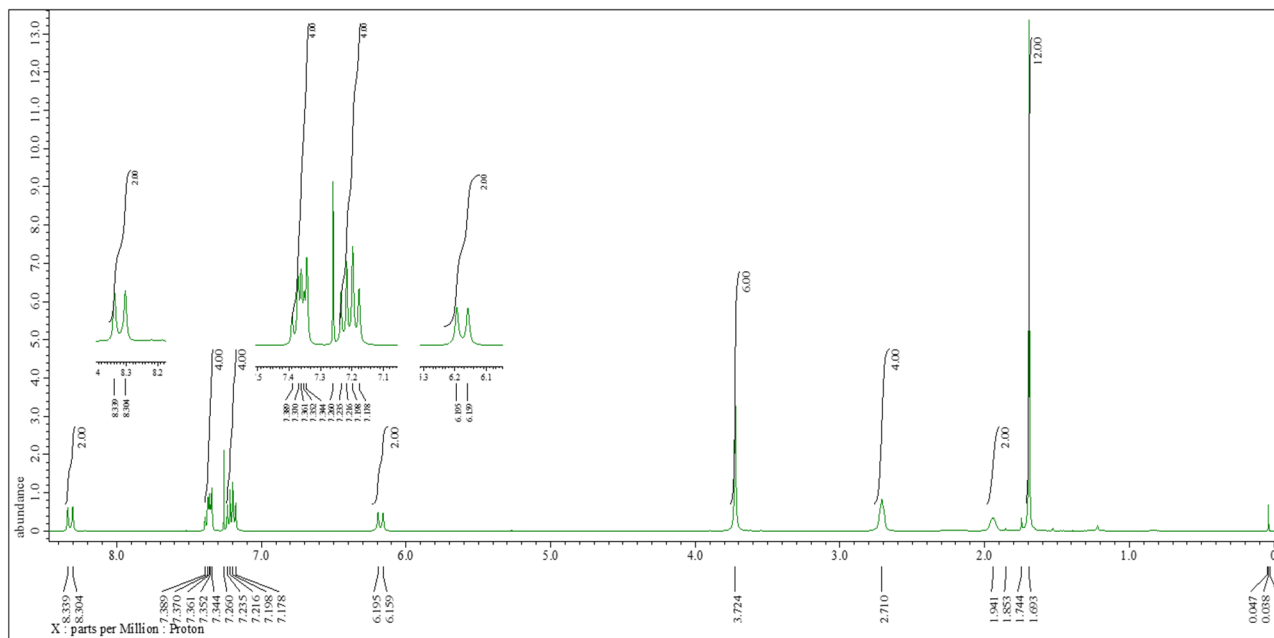

**<sup>13</sup>C NMR**

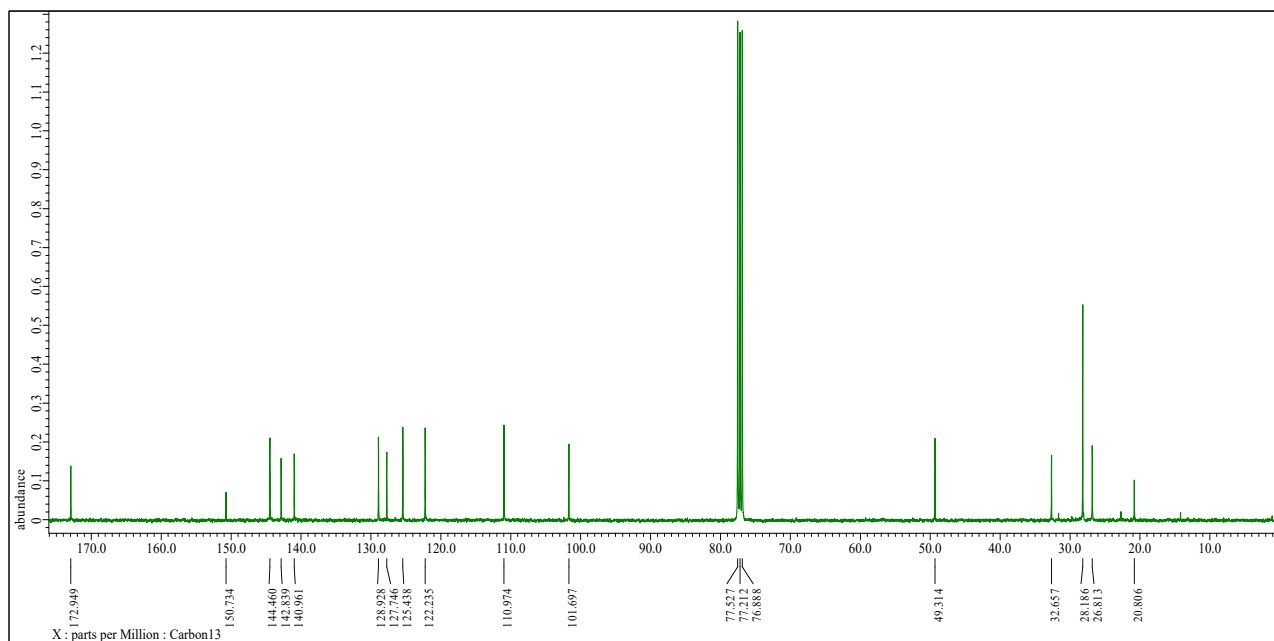

# IR

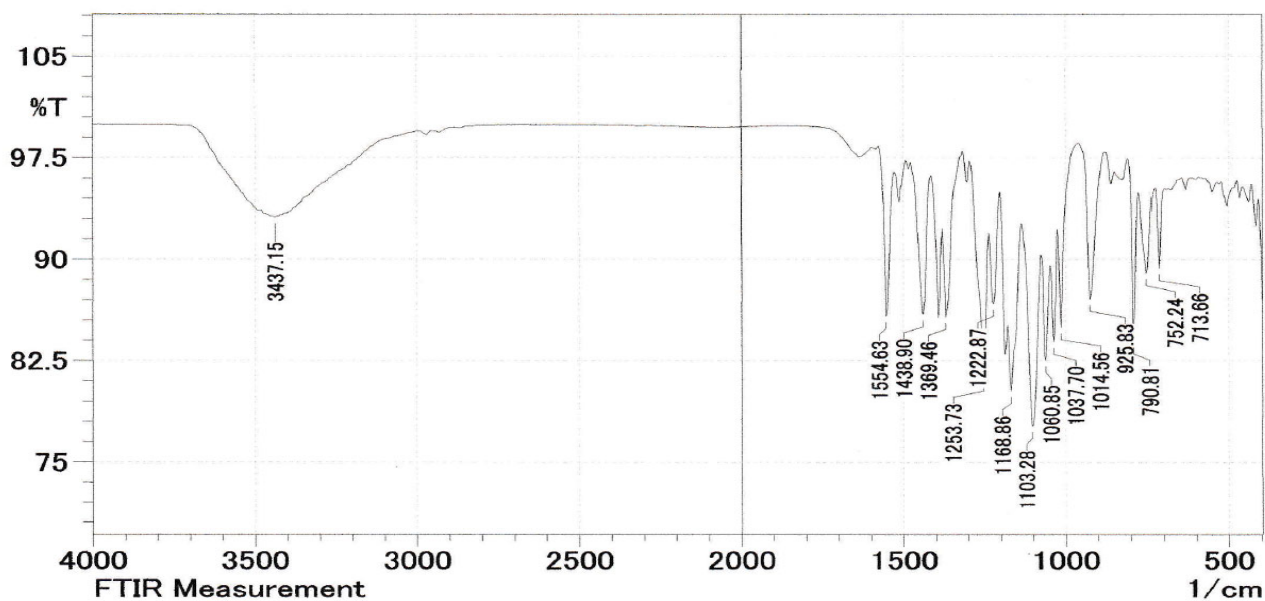

# HRMS

## Elemental Composition Report

### Single Mass Analysis

Tolerance = 15.0 mDa / DBE: min = -1.5, max = 50.0

Element prediction: Off

Number of isotope peaks used for i-FIT = 3

Monoisotopic Mass, Even Electron Ions

1 formula(e) evaluated with 1 results within limits (all results (up to 1000) for each mass)

Elements Used:

C: 32-32 H: 36-36 N: 2-2 Cl: 1-1

20220826\_06 12 (0.421)

1: TOF MS ES+

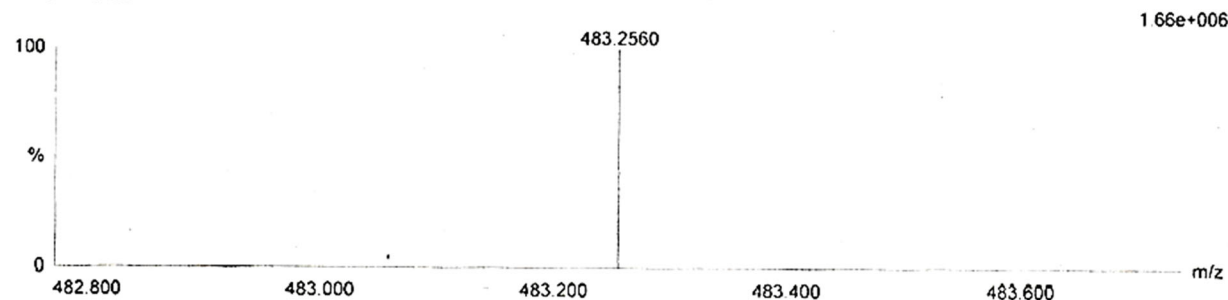

Minimum: -1.5  
Maximum: 15.0 10.0 50.0

| Mass     | Calc. Mass | mDa  | PPM  | DBE  | i-FIT | i-FIT (Norm) | Formula       |
|----------|------------|------|------|------|-------|--------------|---------------|
| 483.2560 | 483.2567   | -0.7 | -1.4 | 15.5 | 43.1  | 0.0          | C32 H36 N2 Cl |

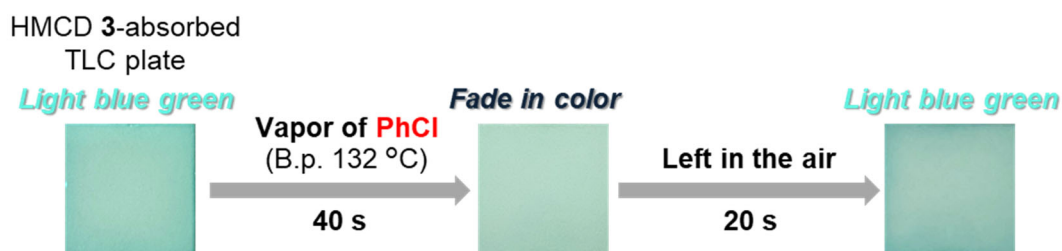

**Figure S1.** Photographs of the TLC plates adsorbed with HMCD **3** using an acetone solution and exposed to PhCl vapor and left in the air.

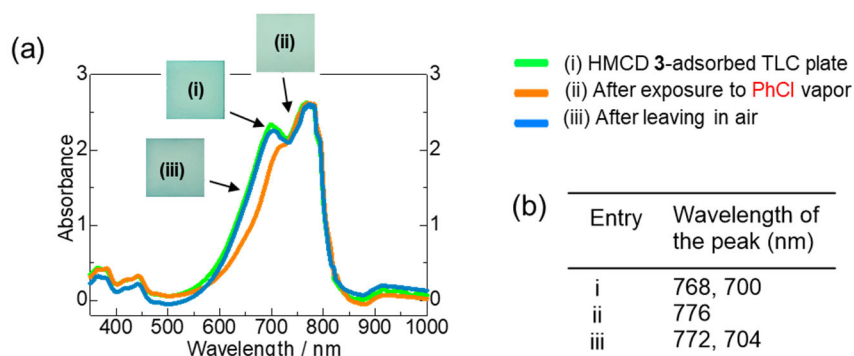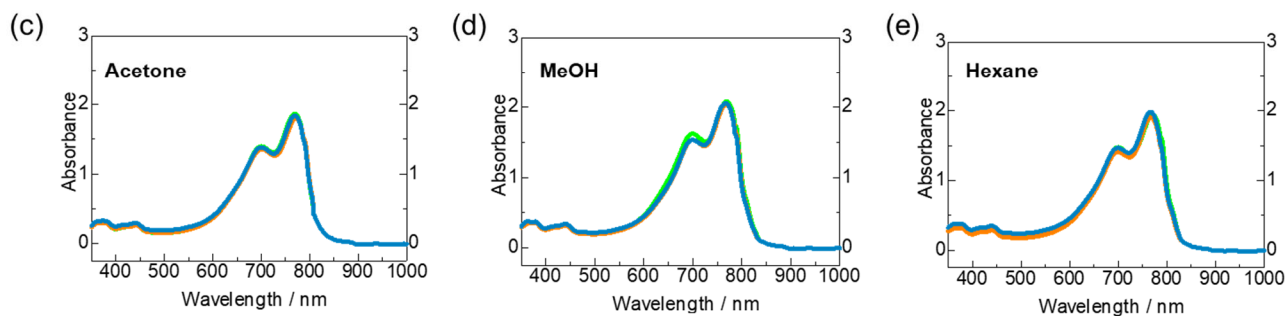

**Figure S2.** UV-Vis-NIR spectrum of TLC plates adsorbed with HMCD **3** using an acetone solution and exposed to solvents. (a) PhCl, (b) acetone, (c) MeOH, and (d) hexane vapor, and (b) wavelengths of the peaks in UV-Vis-NIR spectrum of HMCD **3**-adsorbed TLC plates and exposed to PhCl vapor.

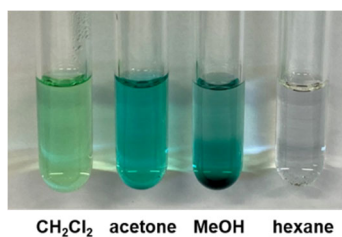

**Figure S3.** Photograph of various solutions (0.5 ml) including HMCD **3** (31 mg).

**Computational Details.** All calculations were performed using computational chemistry software package Gaussian 16 ver. B.01<sup>[2]</sup> using Super Computers at Research Center for Computational Science, Okazaki, Japan.

**a) Ground State Details.**

Ground state geometries of **3** and **3'** were computed at RB3LYP/6-31+G(d,p) level of theory. At the optimized structures, no imaginary frequency was found through the frequency analysis. All coordinates are reported as XYZ Cartesian coordinates. And computed E (RB3LYP) and sum of zero-point and thermal correction energies of optimized structures are shown.

**3**

E (RB3LYP) = -1810.682746 a.u.

Sum of electronic and thermal Energies = -1810.044293 a.u.

Imaginary Frequency = 0

**Table S1.** Cartesian coordinates of the optimized **3**.

| Coordinates (Angstroms) |          |          |          |
|-------------------------|----------|----------|----------|
| Atom                    | X        | Y        | Z        |
| C                       | 7.205471 | 0.07864  | -0.18412 |
| C                       | 6.674557 | -1.20701 | -0.04791 |
| C                       | 7.523434 | -2.30607 | -0.0221  |
| C                       | 8.905616 | -2.0978  | -0.13413 |
| C                       | 9.419682 | -0.80411 | -0.26973 |
| C                       | 8.574457 | 0.311587 | -0.29721 |
| C                       | 4.934923 | 0.395936 | -0.04864 |
| H                       | 7.131595 | -3.31364 | 0.083054 |
| H                       | 9.581508 | -2.94643 | -0.11534 |
| H                       | 10.4915  | -0.65701 | -0.35538 |
| H                       | 8.990493 | 1.307233 | -0.4027  |
| N                       | 6.139476 | 1.01029  | -0.18151 |
| C                       | 6.318352 | 2.451829 | -0.30385 |
| H                       | 7.377986 | 2.676764 | -0.40194 |
| H                       | 5.798495 | 2.828084 | -1.19032 |
| H                       | 5.934116 | 2.962252 | 0.584852 |
| C                       | 5.159641 | -1.12338 | 0.050302 |
| C                       | 4.503407 | -1.87946 | -1.13303 |

|   |           |          |          |
|---|-----------|----------|----------|
| H | 4.791873  | -2.93386 | -1.09266 |
| H | 3.413007  | -1.82665 | -1.09597 |
| H | 4.836063  | -1.47445 | -2.09288 |
| C | 4.676757  | -1.68803 | 1.410411 |
| H | 3.591064  | -1.62715 | 1.514061 |
| H | 4.965154  | -2.74036 | 1.488211 |
| H | 5.133572  | -1.14965 | 2.245536 |
| C | 3.740644  | 1.121192 | -0.01712 |
| H | 3.824943  | 2.19743  | -0.10919 |
| C | 2.459674  | 0.568663 | 0.111755 |
| H | 2.381547  | -0.5069  | 0.183346 |
| C | 1.254205  | 1.283781 | 0.137449 |
| C | -0.000007 | 0.634044 | 0.201922 |
| C | -1.25421  | 1.283798 | 0.137661 |
| C | -2.45968  | 0.56867  | 0.111953 |
| H | -2.38153  | -0.50691 | 0.183307 |
| C | -3.74066  | 1.121216 | -0.0167  |
| H | -3.82497  | 2.19747  | -0.10858 |
| C | -4.93494  | 0.395957 | -0.0483  |
| C | -5.15964  | -1.12337 | 0.050391 |
| C | -6.67454  | -1.20703 | -0.04807 |
| C | -7.20547  | 0.078644 | -0.18404 |
| C | -7.52339  | -2.30611 | -0.02262 |
| C | -8.57444  | 0.311585 | -0.29724 |
| C | -8.90556  | -2.09785 | -0.13477 |
| H | -7.13154  | -3.31369 | 0.082356 |
| C | -9.41965  | -0.80414 | -0.27013 |
| H | -8.99049  | 1.307245 | -0.40256 |
| H | -9.58144  | -2.9465  | -0.11625 |
| H | -10.4915  | -0.65704 | -0.35587 |
| N | -6.13949  | 1.010316 | -0.18112 |
| C | -4.67699  | -1.68821 | 1.410514 |
| H | -4.96542  | -2.74055 | 1.488129 |
| H | -3.59132  | -1.62737 | 1.514362 |
| H | -5.13394  | -1.14993 | 2.245628 |
| C | -4.50317  | -1.87927 | -1.13292 |
| H | -3.41278  | -1.82639 | -1.09567 |
| H | -4.79157  | -2.93369 | -1.09273 |

|    |           |          |          |
|----|-----------|----------|----------|
| H  | -4.83569  | -1.47417 | -2.09278 |
| C  | -6.31838  | 2.451875 | -0.3032  |
| H  | -5.93425  | 2.962137 | 0.585629 |
| H  | -5.79844  | 2.828307 | -1.18956 |
| H  | -7.37801  | 2.676807 | -0.40137 |
| C  | 1.257056  | 2.802177 | 0.052552 |
| H  | 2.138969  | 3.193901 | 0.568894 |
| H  | 1.349366  | 3.109592 | -0.99982 |
| C  | -1.25712  | 2.802212 | 0.053005 |
| H  | -1.34991  | 3.109786 | -0.99928 |
| H  | -2.13882  | 3.193823 | 0.569796 |
| C  | 0.000087  | 3.420397 | 0.66324  |
| H  | 0.000068  | 4.504162 | 0.508242 |
| H  | 0.000287  | 3.249795 | 1.746983 |
| Cl | -0.000038 | -1.1364  | 0.341466 |

### 3'

E (RB3LYP) = -1810.955053 a.u.

Sum of electronic and thermal Energies = -1810.303001 a.u.

Imaginary Frequency = 0

**Table S2.** Cartesian coordinates of the optimized **3'**.

| Atom | Coordinates (Angstroms) |          |          |
|------|-------------------------|----------|----------|
|      | X                       | Y        | Z        |
| C    | -7.23676                | 0.132693 | 0.268329 |
| C    | -6.70638                | -1.13771 | 0.118094 |
| C    | -7.57222                | -2.22945 | 0.218863 |
| C    | -8.92745                | -2.00101 | 0.473557 |
| C    | -9.42597                | -0.70074 | 0.632963 |
| C    | -8.575                  | 0.402637 | 0.526792 |
| C    | -4.88516                | 0.37263  | -0.01314 |
| H    | -7.2045                 | -3.24447 | 0.106929 |
| H    | -9.60507                | -2.84463 | 0.554733 |
| H    | -10.4794                | -0.54518 | 0.839515 |
| H    | -8.95668                | 1.411847 | 0.648685 |
| N    | -6.17781                | 1.160412 | 0.093298 |

|   |          |          |          |
|---|----------|----------|----------|
| C | -6.44201 | 2.068383 | -1.09273 |
| H | -7.39714 | 2.570375 | -0.93712 |
| H | -5.63691 | 2.798463 | -1.16687 |
| H | -6.48157 | 1.446917 | -1.9861  |
| C | -5.2024  | -1.12208 | -0.11982 |
| C | -4.48401 | -1.94573 | 0.980332 |
| H | -4.82775 | -2.98293 | 0.939969 |
| H | -3.40129 | -1.95385 | 0.839677 |
| H | -4.70164 | -1.55417 | 1.977643 |
| C | -4.85643 | -1.68372 | -1.52488 |
| H | -3.78194 | -1.63118 | -1.71887 |
| H | -5.15735 | -2.73343 | -1.58562 |
| H | -5.37636 | -1.13812 | -2.31732 |
| C | -3.73513 | 1.076315 | 0.027306 |
| H | -3.81523 | 2.152298 | 0.165231 |
| C | -2.4029  | 0.529886 | -0.10151 |
| H | -2.33091 | -0.52761 | -0.31238 |
| C | -1.23818 | 1.237432 | 0.019853 |
| C | 0.064577 | 0.582405 | -0.10428 |
| C | 1.274958 | 1.24424  | -0.03425 |
| C | 2.523267 | 0.522928 | -0.04602 |
| H | 2.451953 | -0.55108 | -0.14241 |
| C | 3.764978 | 1.091988 | 0.075144 |
| H | 3.838008 | 2.16786  | 0.180694 |
| C | 5.000259 | 0.373159 | 0.07564  |
| C | 5.249822 | -1.13027 | -0.08428 |
| C | 6.764178 | -1.18404 | -0.01304 |
| C | 7.267494 | 0.107204 | 0.165982 |
| C | 7.642176 | -2.25795 | -0.09586 |
| C | 8.630164 | 0.384812 | 0.2643   |
| C | 9.017124 | -2.00687 | 0.001819 |
| H | 7.282116 | -3.27276 | -0.23402 |
| C | 9.501939 | -0.70354 | 0.178527 |
| H | 9.020753 | 1.387005 | 0.397586 |
| H | 9.717961 | -2.83273 | -0.06122 |
| H | 10.57086 | -0.53304 | 0.249426 |
| N | 6.167009 | 1.007131 | 0.21923  |
| C | 4.752891 | -1.64914 | -1.46051 |



|    |          |          |          |
|----|----------|----------|----------|
| H  | 5.063904 | -2.69012 | -1.5803  |
| H  | 3.66435  | -1.612   | -1.5411  |
| H  | 5.183071 | -1.07197 | -2.2835  |
| C  | 4.624482 | -1.94027 | 1.083956 |
| H  | 3.532913 | -1.91374 | 1.060376 |
| H  | 4.937248 | -2.98405 | 0.998034 |
| H  | 4.961613 | -1.56601 | 2.054416 |
| C  | 6.331081 | 2.455583 | 0.402107 |
| H  | 6.040887 | 2.985581 | -0.50867 |
| H  | 5.727229 | 2.797196 | 1.244815 |
| H  | 7.374583 | 2.669691 | 0.617025 |
| C  | -1.19596 | 2.720578 | 0.338122 |
| H  | -2.12809 | 3.205916 | 0.040526 |
| H  | -1.11115 | 2.844551 | 1.427514 |
| C  | 1.299046 | 2.759036 | 0.077402 |
| H  | 1.538292 | 3.035109 | 1.114838 |
| H  | 2.11163  | 3.150482 | -0.54329 |
| C  | -0.01552 | 3.410689 | -0.34671 |
| H  | -0.0028  | 4.474486 | -0.09252 |
| H  | -0.12933 | 3.340688 | -1.43516 |
| Cl | 0.051577 | -1.16823 | -0.32249 |
| H  | -6.13526 | 1.7512   | 0.93111  |

## Reference

- [1] Gaussian 16, Revision B.01, M. J. Frisch, G. W. Trucks, H. B. Schlegel, G. E. Scuseria, M. A. Robb, J. R. Cheeseman, G. Scalmani, V. Barone, G. A. Petersson, H. Nakatsuji, X. Li, M. Caricato, A. V. Marenich, J. Bloino, B. G. Janesko, R. Gomperts, B. Mennucci, H. P. Hratchian, J. V. Ortiz, A. F. Izmaylov, J. L. Sonnenberg, D. Williams-Young, F. Ding, F. Lipparini, F. Egidi, J. Goings, B. Peng, A. Petrone, T. Henderson, D. Ranasinghe, V. G. Zakrzewski, J. Gao, N. Rega, G. Zheng, W. Liang, M. Hada, M. Ehara, K. Toyota, R. Fukuda, J. Hasegawa, M. Ishida, T. Nakajima, Y. Honda, O. Kitao, H. Nakai, T. Vreven, K. Throssell, J. A. Montgomery, Jr., J. E. Peralta, F. Ogliaro, M. J. Bearpark, J. J. Heyd, E. N. Brothers, K. N. Kudin, V. N. Staroverov, T. A. Keith, R. Kobayashi, J. Normand, K. Raghavachari, A. P. Rendell, J. C. Burant, S. S. Iyengar, J. Tomasi, M. Cossi, J. M. Millam, M. Klene, C. Adamo, R. Cammi, J. W. Ochterski, R. L. Martin, K. Morokuma, O. Farkas, J. B. Foresman, and D. J. Fox, Gaussian, Inc., Wallingford CT, 2016.
